# Supplementary material
Source: PubMed Central journal article supplement (PMC5844307)
Supplement: 859FileS1.pdf [file 859FileS1.pdf]

## Supplementary Information

**Table S1. Primer sequences for quantitative PCR**

| Gene          | Sequence of forward (F) and reverse (R ) primers      | Start location of fox amplicon in CanFam3.1 |
|---------------|-------------------------------------------------------|---------------------------------------------|
| <i>AKAP7</i>  | F: CCTATCCATTCCGATCACCAAC<br>R: AGTCGCTCATCTTGCTGGAG  | chr1:69376373                               |
| <i>ANKRD6</i> | F: AACACGGCTCTACACGAAGC<br>R: CTCTGGGAGTGGCTGTTCTG    | chr12:48811400                              |
| <i>BRCA2</i>  | F: GCAGAACTGGTAGGCTCTCC<br>R: ATACCAGCAAGCAGGACGAG    | chr25:7753591                               |
| <i>CDH4</i>   | F: GACATCTGGATCCCCTGGC<br>R: TCAGGACACTTCAGCATCCG     | chr24:46055878                              |
| <i>ITGA1</i>  | F: GGCCAATGAGACTGTCCCTG<br>R: CAGCTTAAGTTCTGGCATCGG   | chr4:62309206                               |
| <i>LAMA2</i>  | F: ACCTCTGCTCGCTATATTCGC<br>R:CCGACTGAAATATCCTTGACCG  | chr1: 67735809                              |
| <i>NELL2</i>  | F: CCTTCAGCGCACTCATCAATG<br>R: GGCCGTTTGTAGCTGTCGAG   | chr27: 9535623                              |
| <i>PDE7B</i>  | F: CCCATTCATTGACTTCCGCC<br>R: TCCACGAAGCAACCTCGATG    | chr1: 28719580                              |
| <i>SDHA</i>   | F: CCTGCGTCACAAAGCTCTTT<br>R: TGTCATGTAGTGGATGGCGT    | chr34:11957015                              |
| <i>SPOCK1</i> | F: GGGAGTCCTTGCAGATTGGC<br>R: ACTGGTTTGGAGCCCTTCAC    | chr11: 24748659                             |
| <i>THBS4</i>  | F: TGCAAGTTGGTCAGTCTCAGG<br>R: CACTGTGATGGGACGCTTAAAC | chr3: 26970860                              |

**Table S2. Reads from sequencing of tame and aggressive fox anterior pituitary RNA**

| <b>Sample</b>     |        | <b>Reads (unfiltered)</b>           | <b>Reads (filtered)</b>             |
|-------------------|--------|-------------------------------------|-------------------------------------|
| Tame              | 1-601  | 34,577,964                          | 32,479,541                          |
|                   | 2-662  | 31,279,625                          | 29,749,267                          |
|                   | 3-663  | 33,576,358                          | 31,677,842                          |
|                   | 4-664  | 37,936,135                          | 36,086,260                          |
|                   | 5-665  | 34,731,107                          | 31,347,816                          |
|                   | 6-666  | 34,735,178                          | 32,916,697                          |
| Aggressive        | 49-649 | 32,688,890                          | 32,866,684                          |
|                   | 50-710 | 33,570,511                          | 32,694,392                          |
|                   | 51-711 | 32,901,110                          | 31,043,144                          |
|                   | 52-712 | 33,126,696                          | 31,429,811                          |
|                   | 53-713 | 32,876,971                          | 31,237,749                          |
|                   | 54-714 | 34,760,977                          | 31,328,261                          |
| <b>Tame</b>       |        | Mean = 34,168,005<br>SD = 2,239,555 | Mean = 32,376,237<br>SD = 2,121,953 |
| <b>Aggressive</b> |        | Mean = 33,625,582<br>SD = 906,373   | Mean = 31,766,674<br>SD = 797,449   |

**Table S3. Alignment rate of reads from tame and aggressive fox anterior pituitary RNA**

| <b>Sample</b> |        | <b>Alignment rate (%)</b> |
|---------------|--------|---------------------------|
| Tame          | 1-601  | 79.0                      |
|               | 2-662  | 78.9                      |
|               | 3-663  | 79.1                      |
|               | 4-664  | 79.5                      |
|               | 5-665  | 79.2                      |
|               | 6-666  | 79.3                      |
| Aggressive    | 49-649 | 78.5                      |
|               | 50-710 | 78.9                      |
|               | 51-711 | 78.8                      |
|               | 52-712 | 79.0                      |
|               | 53-713 | 79.0                      |
|               | 54-714 | 78.5                      |

**Table S4. Genes expressed in fox anterior pituitary tissue, with counts (normalized by DESeq2) averaged across all 12 samples. The table includes both tame and aggressive foxes.**

*fox-pituitary-expr.xlsx*

**Table S5. Significantly enriched GO terms in the 0.1% (180) most highly expressed genes in fox anterior pituitary tissue.** The table includes GO identifier, name of enriched GO term, number of DE genes associated with the GO term, percent of genes associated with the GO term which are DE, p-value, corrected p-value (FDR), symbols of the DE genes in the GO term, and symbols of all the genes in the GO term.

*fox-pituitary-topexpr-GO.xlsx*

**Table S6. Differentially expressed genes in tame versus aggressive fox anterior pituitary tissue.**

*fox-pituitary-DEG.xlsx*

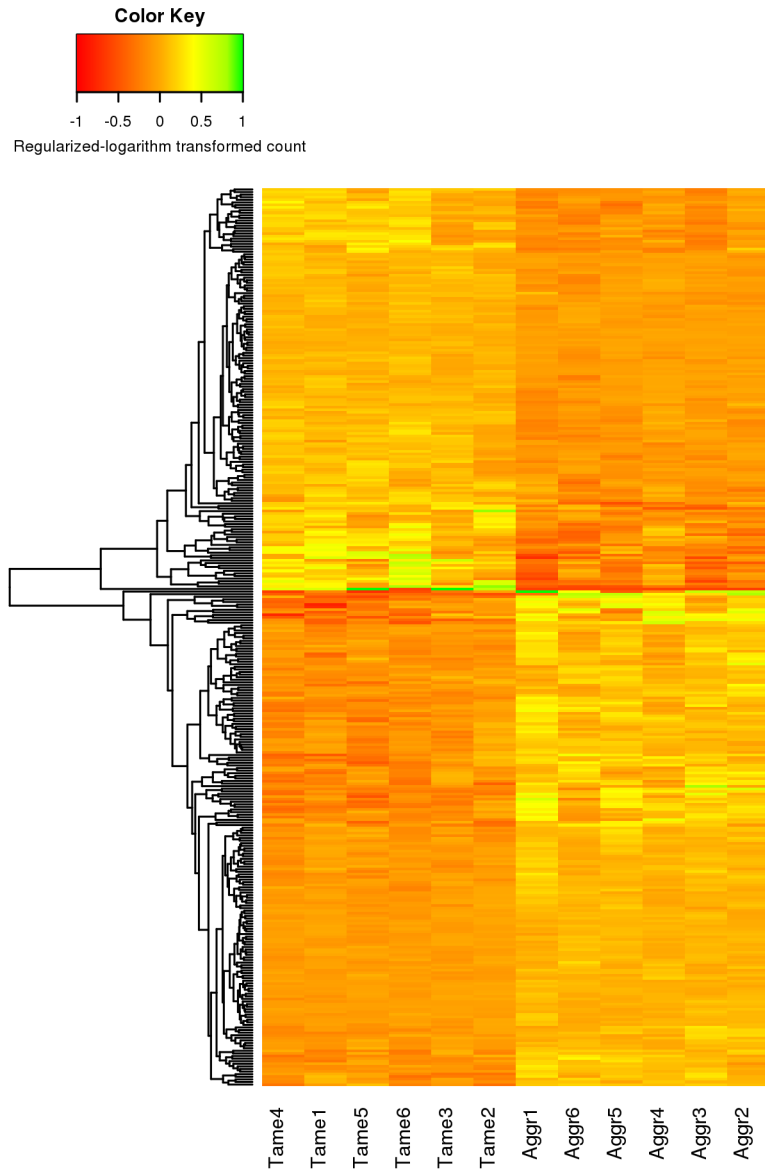

**Figure S1. Heat map of differentially expressed genes (346) in tame versus aggressive fox pituitary tissue (FDR < 0.05).**

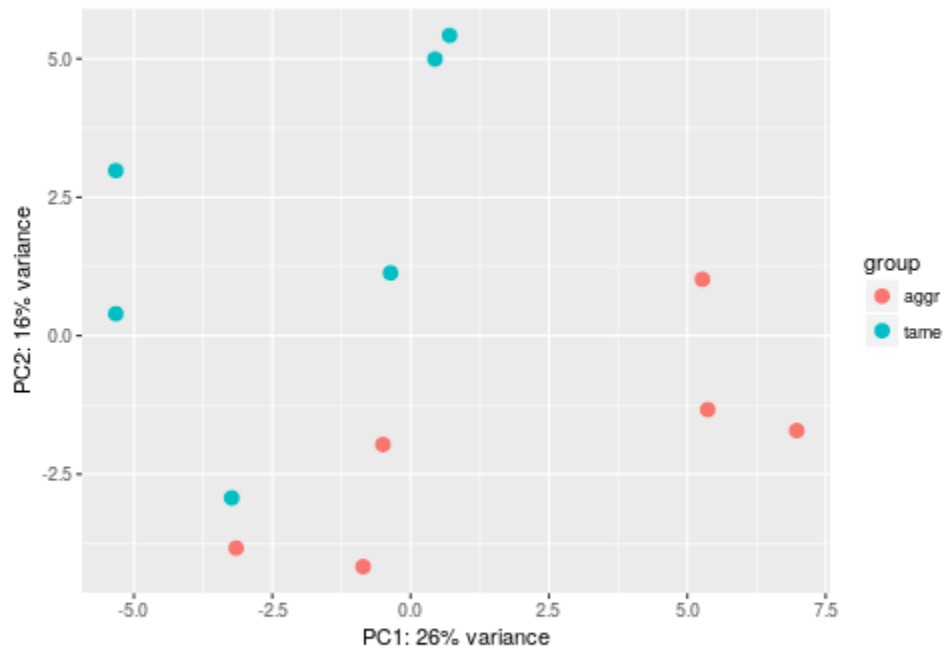

**Figure S2. Principal components analysis of tame versus aggressive fox pituitary samples by gene expression, comparing PC1 versus PC2. Note clustering of tame (blue) versus aggressive (red) samples.**

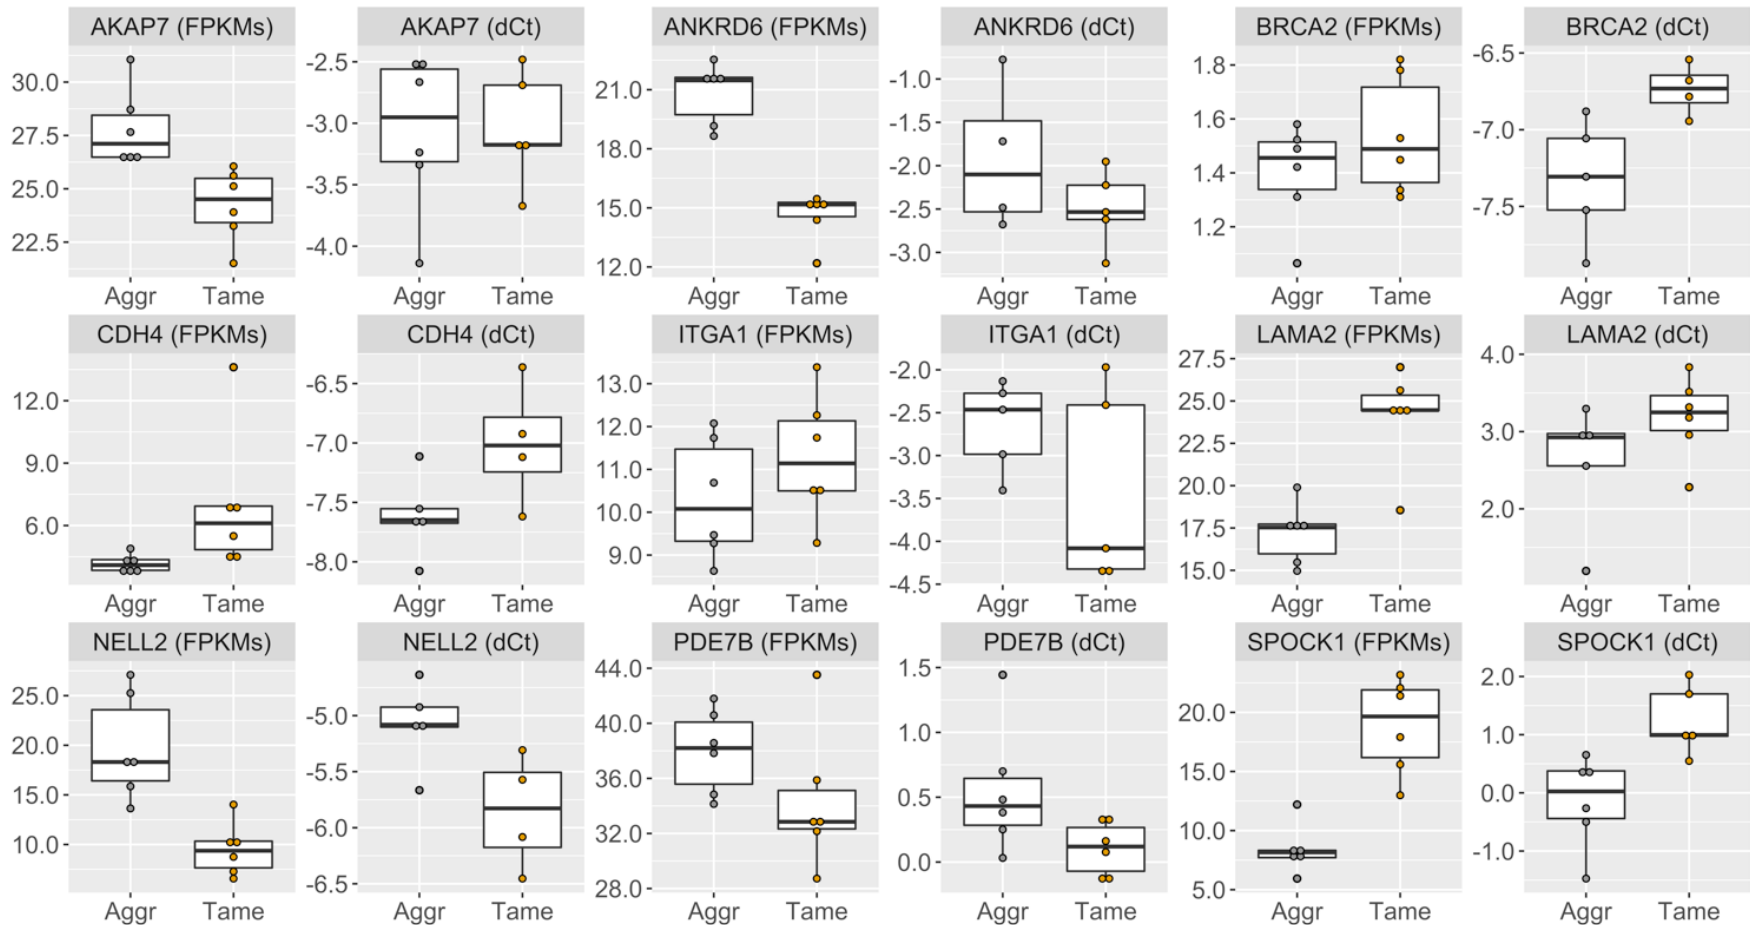

**Figure S3. Side-by-side comparison of FPKM counts (RNA-seq gene expression results) and dCt (qPCR gene expression results) for nine genes.** All FPKM counts include six tame and six aggressive samples; dCt results have fewer samples for some genes due to failed qPCR reactions. All dCt values are relative to the *SDHA* reference gene, and therefore some values may be negative.

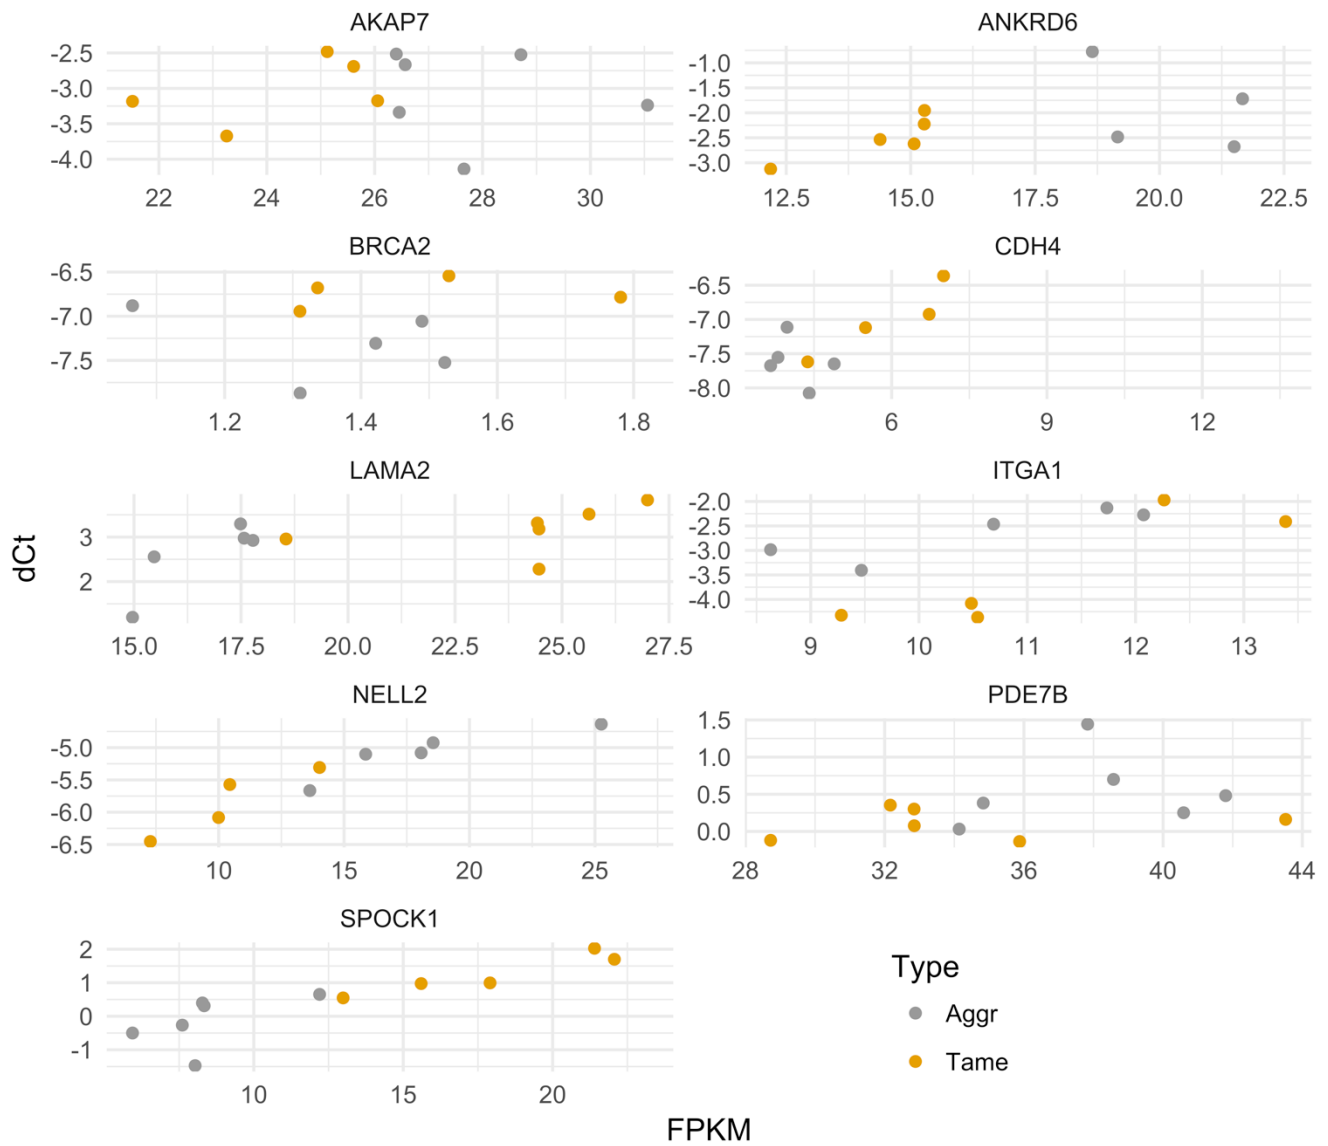

**Figure S4. Scatterplot of RT-qPCR (dCt, y-axis) and RNA sequencing (FPKM, x-axis) results in tame and aggressive fox anterior pituitary tissue for nine genes.**



**Table S7. Comparison of RT-qPCR and RNA sequencing results in tame and aggressive fox anterior pituitary tissue.**

| Gene          | RNA-seq                      |          | qPCR  |              |
|---------------|------------------------------|----------|-------|--------------|
|               | Log <sub>2</sub> fold change | FDR      | ddCt  | Wilcoxon     |
| <i>AKAP7</i>  | -0.23                        | 0.003    | -0.32 | W=4, p=0.63  |
| <i>ANKRD6</i> | -0.51                        | 7.98e-10 | -0.15 | W=9, p=0.40  |
| <i>BRCA2</i>  | 0.54                         | 8.46e-5  | 0.33  | W=0, p=0.10  |
| <i>CDH4</i>   | 0.40                         | 0.049    | 0.83  | W=1, p=0.11  |
| <i>ITGA1</i>  | 0.21                         | 0.029    | -0.89 | W=7, p=0.85  |
| <i>LAMA2</i>  | 0.46                         | 4.66e-6  | 0.58  | W=1, p=0.11  |
| <i>NELL2</i>  | -0.61                        | 0.0001   | -0.64 | W=11, p=0.11 |
| <i>PDE7B</i>  | -0.25                        | 0.024    | -0.35 | W=12, 0.34   |
| <i>SPOCK1</i> | 0.78                         | 3.58e-8  | 1.19  | W=1, 0.06    |

ddCt values for qPCR assays were calculated using the Applied Biosystems StepOnePlus Real Time PCR System software (Applied Biosystems, Foster City, CA) for all tame versus all aggressive samples for each gene. Significant differences in gene ddCt values were calculated by comparing individual ddCt values from tame and aggressive samples for each gene using the Wilcoxon rank-sum test.

**Table S8. Significantly enriched GO terms in differentially expressed genes in tame versus aggressive fox anterior pituitary tissue.** The table includes GO identifier, name of enriched GO term, number of DE genes associated with the GO term, percent of genes associated with the GO term which are DE, p-value, corrected p-value (FDR), symbols of the DE genes in the GO term, and symbols of all the genes in the GO term.

*fox-pituitary-GO.xlsx*

**Table S9. Significantly enriched GO terms in genes significantly up-regulated in aggressive fox anterior pituitary tissue.** The table includes GO identifier, name of enriched GO term, number of DE genes associated with the GO term, percent of genes associated with the GO term which are DE, p-value, corrected p-value (FDR), symbols of the DE genes in the GO term, and symbols of all the genes in the GO term.

*fox-pituitary-GO-aggr.xlsx*

**Table S10. Significantly enriched GO terms in genes significantly up-regulated in tame fox anterior pituitary tissue.** The table includes GO identifier, name of enriched GO term, number of DE genes associated with the GO term, percent of genes associated with the GO term which are DE, p-value, corrected p-value (FDR), symbols of the DE genes in the GO term, and symbols of all the genes in the GO term.

*fox-pituitary-GO-tame.xlsx*

**Table S11. Antique White 4, Pale Turquoise, and Brown WGCNA modules.** The table includes gene symbol and module membership (e.g., the correlation of its gene expression profile with the module eigengene), and whether individual genes are differentially expressed in tame versus aggressive fox anterior pituitary.

*fox-pituitary-WGCNA.xlsx*

**Table S12. All WGCNA modules identified in fox anterior pituitary.** The table includes genes in each module and the module membership of each gene (e.g., the correlation of its gene expression profile with the module eigengene).

*fox-pituitary-WGCNA-membership.xlsx*

**Table S13. Enriched GO terms in 13 WGCNA modules in tame and aggressive fox pituitary.** The table includes GO identifier, name of enriched GO term, p-value, corrected p-value (FDR), percent of

genes in the GO term which are associated with the module, number of genes in the GO term which are associated with the module, and the list of gene symbols in the GO term which are associated with the module. Modules were selected from those with eigengenes that significantly differed between tame and aggressive samples before correction with Benjamini-Hochberg.

*fox-pituitary-WGCNA-GO.xlsx*

**Table S14. Exons differentially skipped in tame versus aggressive fox anterior pituitary tissue, as identified by rMATS.** The table includes Ensembl ID, gene symbol, p value, FDR, percent of reads covering skipped exon in tame samples (mean), and percent of reads covering skipped exon in aggressive samples (mean).

*fox-pituitary-skippedexons.xlsx*
